# Supplementary material for: Metabolic profile of leukemia cells influences treatment efficacy of L-asparaginase
Source: Springer Nature journal article supplement (doi:10.1186/s12885-020-07020-y), 2020-06-05
Supplement: MOESM2 [file 18054292]

| <b>Primary antibody</b>                                  | <b>Supplier</b>           | <b>Description</b>   | <b>Dilution</b> |
|----------------------------------------------------------|---------------------------|----------------------|-----------------|
| Akt (pan) (40D4)                                         | Cell Signaling Technology | Mouse monoclonal Ab  | 1:1000          |
| Phospho-Akt (Ser473) (D9E) XP®                           | Cell Signaling Technology | Rabbit monoclonal Ab | 1:1000          |
| S6 Ribosomal Protein (5G10)                              | Cell Signaling Technology | Rabbit monoclonal Ab | 1:1000          |
| Phospho-S6 Ribosomal Protein (Ser235/236) (D57.2.2E) XP® | Cell Signaling Technology | Rabbit monoclonal Ab | 1:1000          |
| c-Myc Antibody                                           | Cell Signaling Technology | Rabbit polyclonal Ab | 1:1000          |
| AMPK $\alpha$ (23A3)                                     | Cell Signaling Technology | Rabbit monoclonal Ab | 1:1000          |
| Phospho-AMPK $\alpha$ (Thr172) (40H9)                    | Cell Signaling Technology | Rabbit monoclonal Ab | 1:1000          |
| GSK-3 $\beta$ (27C10)                                    | Cell Signaling Technology | Rabbit monoclonal Ab | 1:1000          |
| Phospho-GSK-3 $\beta$ (Ser9) (5B3)                       | Cell Signaling Technology | Rabbit monoclonal Ab | 1:1000          |
| $\beta$ -Actin (clone AC-74, ascites fluid)              | Sigma-Aldrich             | Mouse monoclonal Ab  | 1:5000          |
